# Supplementary material for: Combining Augmented Reality and 3D Printing to Improve Surgical Workflows in Orthopedic Oncology: Smartphone Application and Clinical Evaluation
Source: MDPI journal article supplement (doi:10.3390/s21041370), 2021-02-15
Supplement: s1 [file s1]

# Survey to patients for ARHealth project

| Patient ID                                                                                        |                                                                                 |   |                             |   |   |
|---------------------------------------------------------------------------------------------------|---------------------------------------------------------------------------------|---|-----------------------------|---|---|
| Date                                                                                              |                                                                                 |   |                             |   |   |
| Had you ever seen a 3D model of any part of your body before?                                     | <input type="checkbox"/> Yes                                                    |   | <input type="checkbox"/> No |   |   |
| Question                                                                                          | Rating                                                                          |   |                             |   |   |
| 1. How easy was to understand your situation from the medical images and the surgeon explanation? | 1                                                                               | 2 | 3                           | 4 | 5 |
| 2. How easy was to understand your situation with the AR smartphone app?                          | 1                                                                               | 2 | 3                           | 4 | 5 |
| 3. What is your general opinion about AR?                                                         | 1                                                                               | 2 | 3                           | 4 | 5 |
| 4. Do you prefer the explanation of your pathology with AR or as traditionally?                   | <input type="checkbox"/> AR<br><input type="checkbox"/> Traditional explanation |   |                             |   |   |
| Observations                                                                                      |                                                                                 |   |                             |   |   |
