# Supplementary material for: Combining Augmented Reality and 3D Printing to Improve Surgical Workflows in Orthopedic Oncology: Smartphone Application and Clinical Evaluation
Source: MDPI journal article supplement (doi:10.3390/s21041370), 2021-02-15
Supplement: s1 [file s1]

# Survey to surgeons for ARHealth project

|                              |                              |  |  |  |  |                             |  |  |  |  |
|------------------------------|------------------------------|--|--|--|--|-----------------------------|--|--|--|--|
| Name                         |                              |  |  |  |  |                             |  |  |  |  |
| Date                         |                              |  |  |  |  |                             |  |  |  |  |
| Medical specialty            |                              |  |  |  |  |                             |  |  |  |  |
| Had you ever used AR before? | <input type="checkbox"/> Yes |  |  |  |  | <input type="checkbox"/> No |  |  |  |  |

  

| Question                                                   | Rating |   |   |   |   |
|------------------------------------------------------------|--------|---|---|---|---|
| 1. What do you think about the use of AR during surgeries? | 1      | 2 | 3 | 4 | 5 |
| 2. Would you like to use AR in your surgeries?             | 1      | 2 | 3 | 4 | 5 |

  

| DEMO MODE                                                                                                                      |   |   |   |   |   |
|--------------------------------------------------------------------------------------------------------------------------------|---|---|---|---|---|
| 3. Do you think that the 3D visualization obtained in the DEMO mode could help the surgeon to better understand the pathology? | 1 | 2 | 3 | 4 | 5 |
| 4. Do you think that the DEMO mode could facilitate the surgical planning?                                                     | 1 | 2 | 3 | 4 | 5 |
| 5. Do you think that the DEMO mode could be useful to assist during patient communication?                                     | 1 | 2 | 3 | 4 | 5 |

  

| CLINIC MODE                                                                                                                                                     |   |   |   |   |   |
|-----------------------------------------------------------------------------------------------------------------------------------------------------------------|---|---|---|---|---|
| 6. Do you think that 3D printing a bone fragment for the app CLINIC mode could be useful for practicing surgical guide placement before surgical interventions? | 1 | 2 | 3 | 4 | 5 |
| 7. Do you think that the app CLINIC mode would be useful to get used to AR visualization before surgeries?                                                      | 1 | 2 | 3 | 4 | 5 |
| 8. Do you think that the app CLINIC mode would be useful to explain the patient his/her pathology?                                                              | 1 | 2 | 3 | 4 | 5 |

  

| SURGERY MODE                                                                                                                                         |   |   |   |   |   |
|------------------------------------------------------------------------------------------------------------------------------------------------------|---|---|---|---|---|
| 9. Do you think that the SURGERY mode would facilitate tumor location in relation to the visible structures of the patient's body during operations? | 1 | 2 | 3 | 4 | 5 |
| 10. Do you think that ARHealth could increase the accuracy of orthopedic oncological surgeries?                                                      | 1 | 2 | 3 | 4 | 5 |
| 11. What do you think about the AR visualization on a smartphone/tablet in sterilizable case suitable for its use in the OR?                         | 1 | 2 | 3 | 4 | 5 |

  

| GENERIC QUESTIONS                                                                                                            |   |   |   |   |   |
|------------------------------------------------------------------------------------------------------------------------------|---|---|---|---|---|
| 12. Do you think that the AR information provided through the virtual models projected over the image, is easy to interpret? | 1 | 2 | 3 | 4 | 5 |
| 13. Do you think this technology could improve patient communication?                                                        | 1 | 2 | 3 | 4 | 5 |
| 14. Do you think that AR could enhance the surgeons' confidently during surgical interventions?                              | 1 | 2 | 3 | 4 | 5 |
| 15. Would you include this technology in your workflow?                                                                      | 1 | 2 | 3 | 4 | 5 |

  

|                                                                                        |                                                           |                                          |
|----------------------------------------------------------------------------------------|-----------------------------------------------------------|------------------------------------------|
| 16. Which medical areas do you think that could benefit the most from this technology? | <input type="checkbox"/> Orthopedic surgery               | <input type="checkbox"/> Cardiac surgery |
|                                                                                        | <input type="checkbox"/> Oncologic surgery                | <input type="checkbox"/> Neurosurgery    |
|                                                                                        | <input type="checkbox"/> Minimally Invasive Surgery (MIS) | <input type="checkbox"/> Plastic surgery |
|                                                                                        | <input type="checkbox"/> Others:                          |                                          |
|                                                                                        |                                                           |                                          |

  

|              |  |
|--------------|--|
| Observations |  |
|--------------|--|
